# Supplementary material for: Predicting Fecundity of Fathead Minnows (Pimephales promelas) Exposed to Endocrine-Disrupting Chemicals Using a MATLAB®-Based Model of Oocyte Growth Dynamics
Source: PLOS journal article supplement (doi:10.1371/journal.pone.0146594), 2016-01-12
Supplement: S2 (10.1371/journal.pone.0146594.s002) [file journal.pone.0146594.s002]

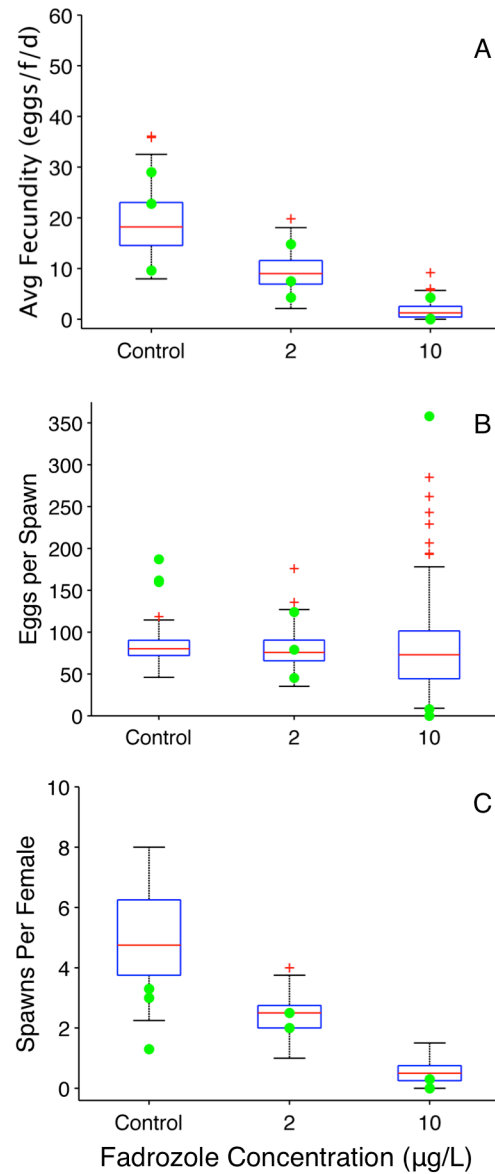

**S1 Fig. Fadozole reproduction metrics (group spawning design) - no spawn binning.**

A – Average fecundity (eggs•female<sup>-1</sup>•day<sup>-1</sup>). B – Average number of eggs per spawn. A value of zero indicates that a fish did not spawn during the experiment. C – Average number of spawns per female. Filled circles represent experimentally observed values [1]. Boxplots represent 50 OGDM-simulated values. In the boxplots, the red line represents the median, lower and upper edges of the box are the 25<sup>th</sup> and 75<sup>th</sup> percentiles, respectively, lower and upper whiskers denote the most extreme values that are not outliers ( $\sim 2.7\sigma$  or 99.3 percentile for normally distributed values), and the red + symbol represents outliers.

## References cited:

1. Ankley GT, Kahl MD, Jensen KM, Hornung MW, Korte JJ, et al. (2002) Evaluation of the aromatase inhibitor fadrozole in a short-term reproduction assay with the fathead minnow (*Pimephales promelas*). Toxicological Sciences 67: 121-130.
